# Supplementary material for: Novel Diketopyrrolopyrrole-Based π-Conjugated Molecules Synthesized Via One-Pot Direct Arylation Reaction
Source: PubMed Central journal article supplement (PMC6539255; doi:10.3390/molecules24091760), 2019-05-07
Supplement: molecules-24-01760-s001.pdf [file molecules-24-01760-s001.pdf]

# Novel Diketopyrrolopyrrole-based $\pi$ -Conjugated Molecules Synthesized via One-Pot Direct Arylation Reaction

Hui Liu <sup>a</sup> Xiao-Feng Zhang <sup>a</sup> Jing-Zhao Cheng <sup>a</sup> Ai-Guo Zhong <sup>b</sup> He-Rui Wen <sup>\*,a</sup> and Shi-Yong Liu <sup>\*,a</sup>

<sup>a</sup>*School of Metallurgical and Chemical Engineering, Jiangxi University of Science and Technology, Ganzhou 341000, China*

<sup>b</sup>*School of Materials and Metallurgy, Inner Mongolia University of Science and Technology, Baotou, 014010, China*

## Supplementary Information

### Contents

|                                                |        |
|------------------------------------------------|--------|
| 1. DFT-optimized geometries.....               | S2     |
| 2. <sup>1</sup> H and <sup>13</sup> C NMR..... | S3-11  |
| 3. Maldi-TOF MS spectra.....                   | S12-20 |

## 1.DFT-optimized geometries

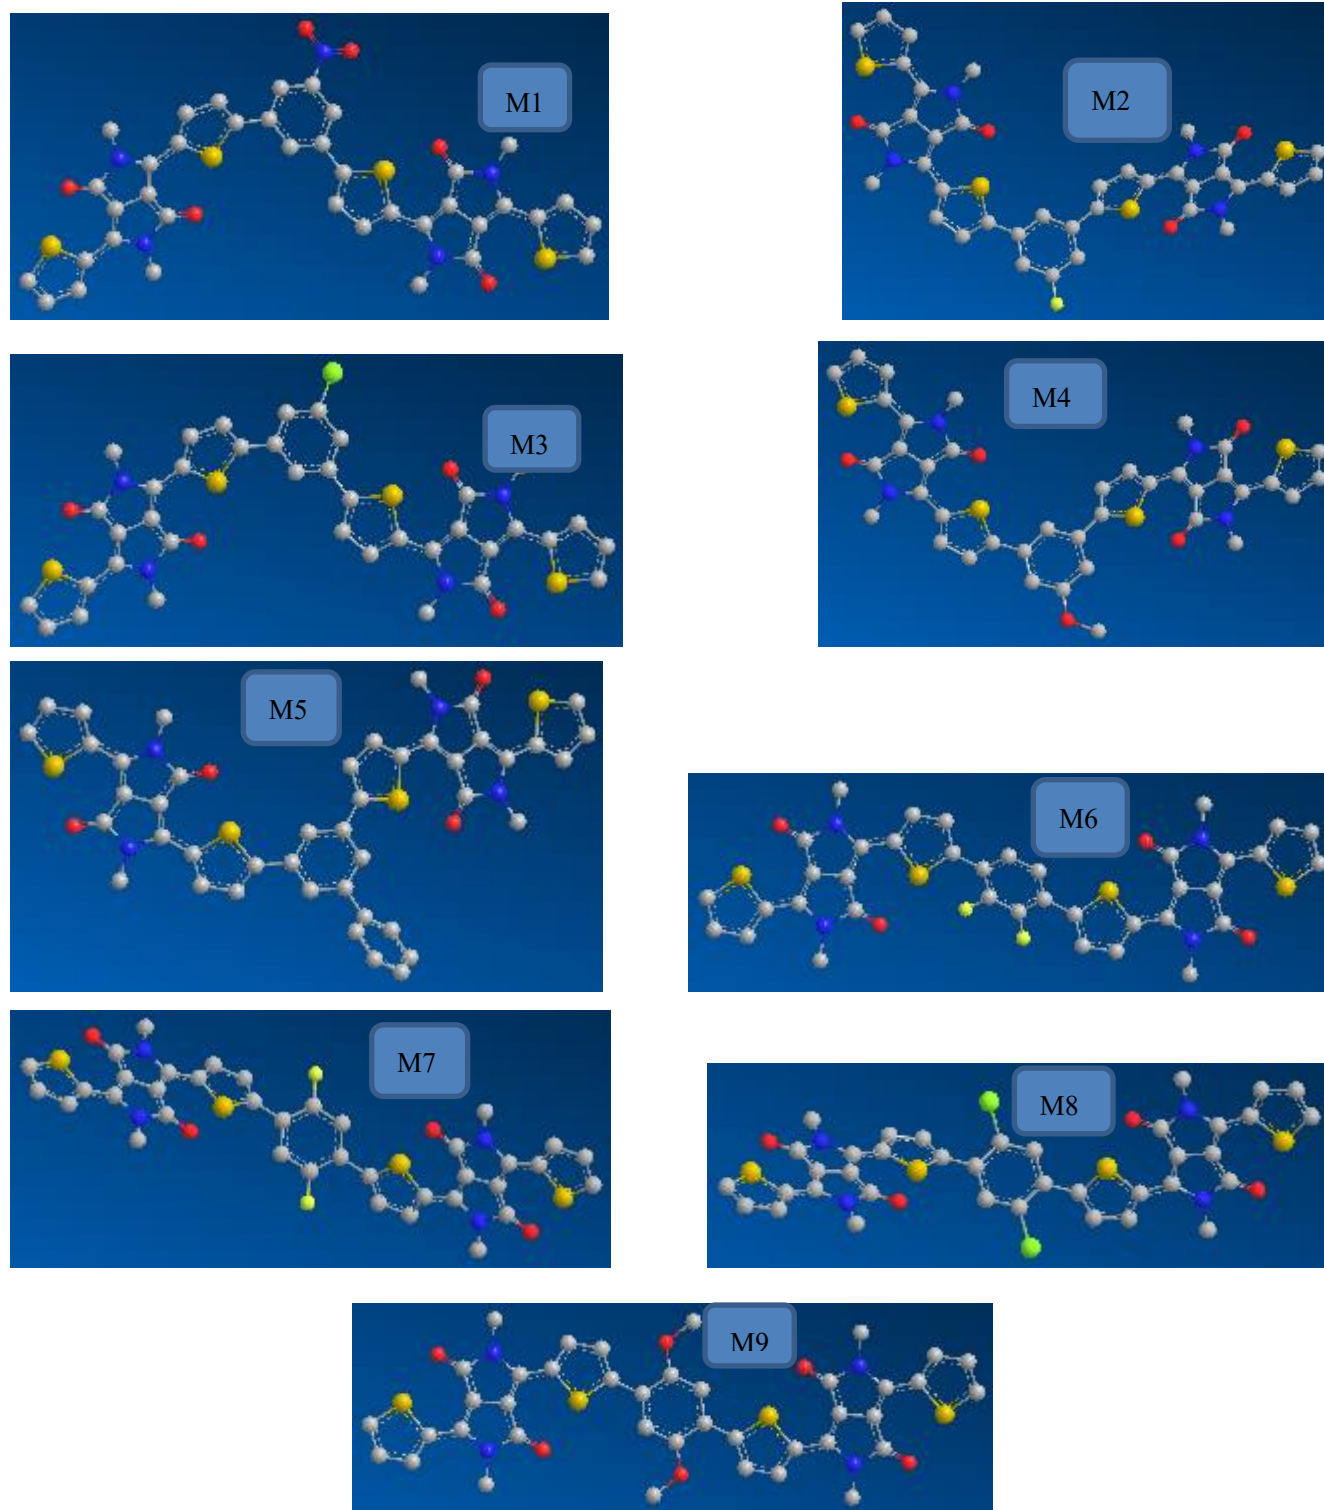

**Figure S1** DFT-optimized geometries of Molecules **Ms1~9** (the alkyl chains replaced by methyl groups).

2.  $^1\text{H}$  and  $^{13}\text{C}$  NMR spectra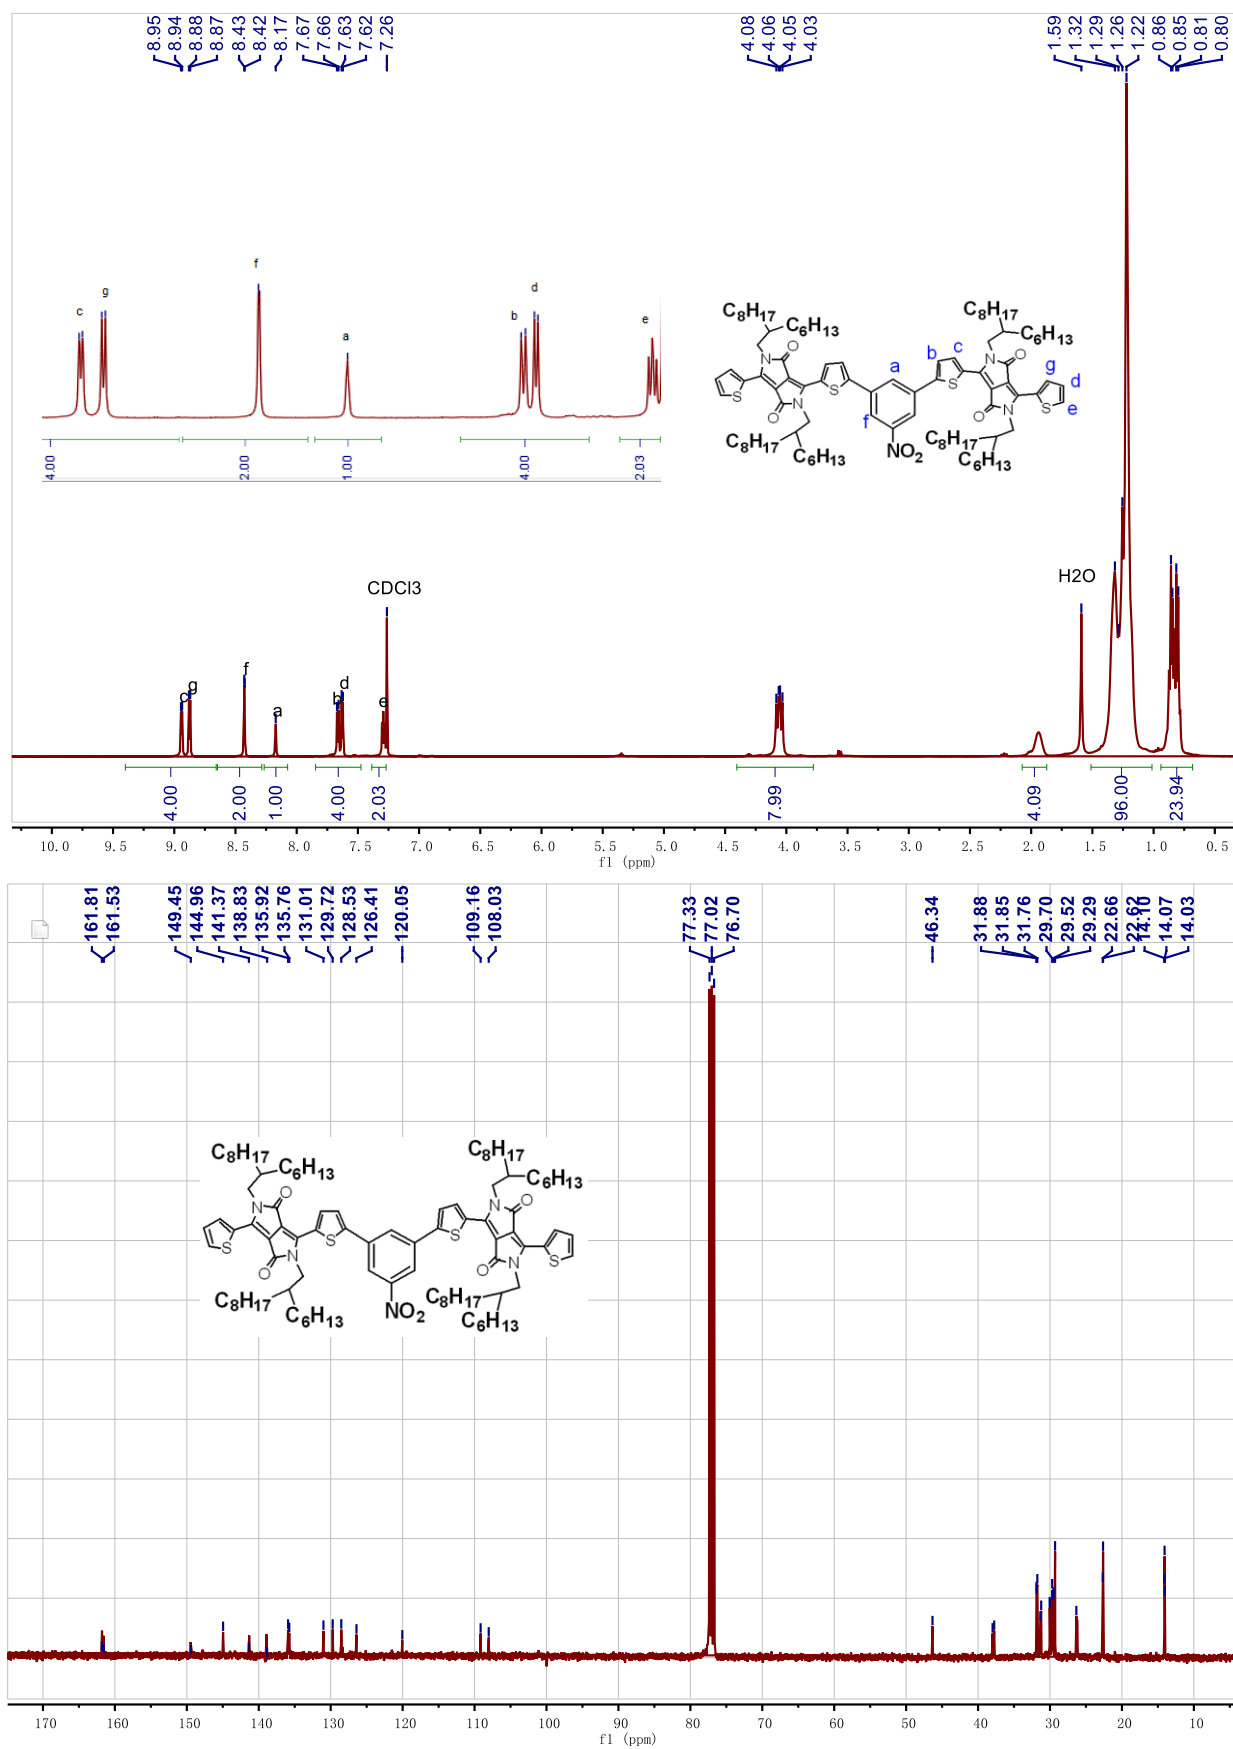Figure S2  $^1\text{H}$  and  $^{13}\text{C}$  NMR spectra of M1 in  $\text{CDCl}_3$ .

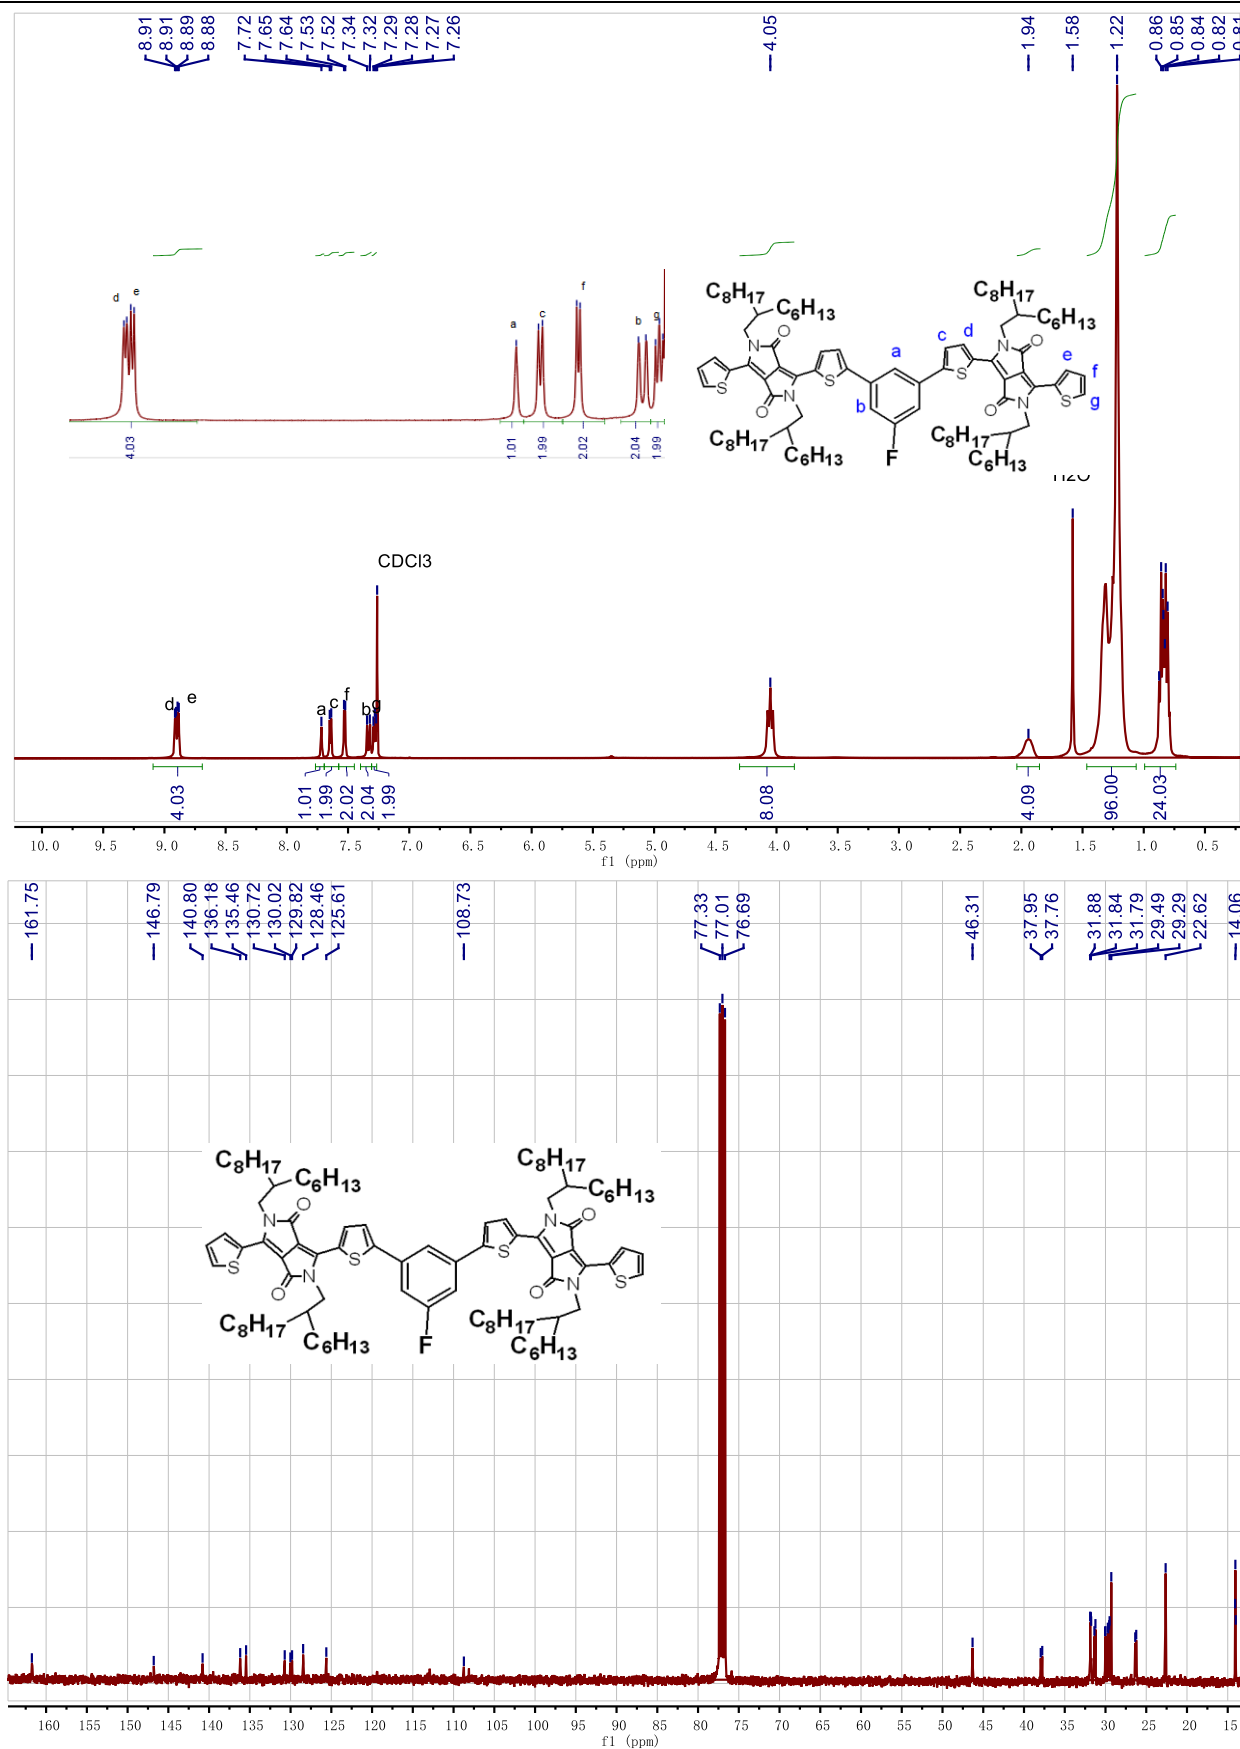**Figure S3**  $^1\text{H}$  and  $^{13}\text{C}$  NMR spectra of M2 in  $\text{CDCl}_3$ .

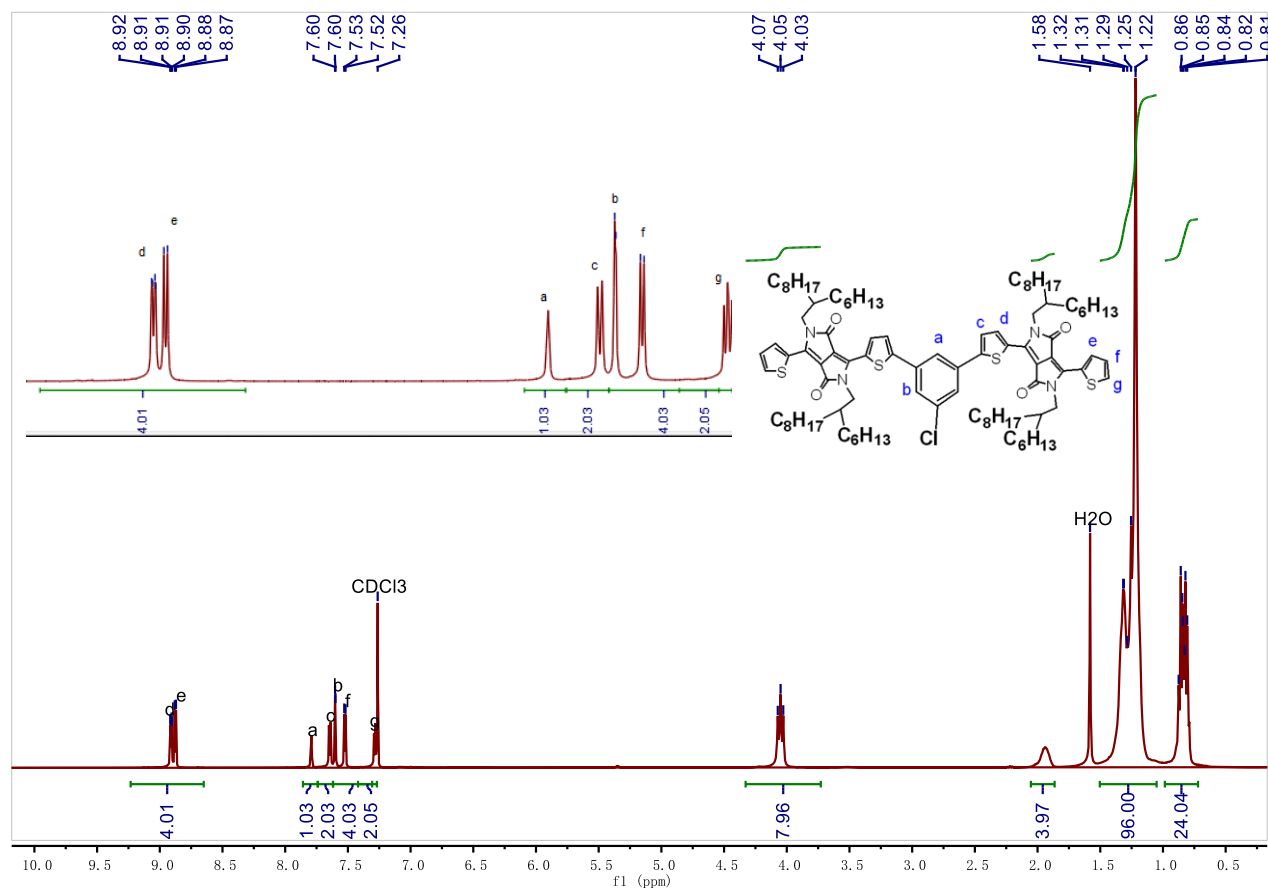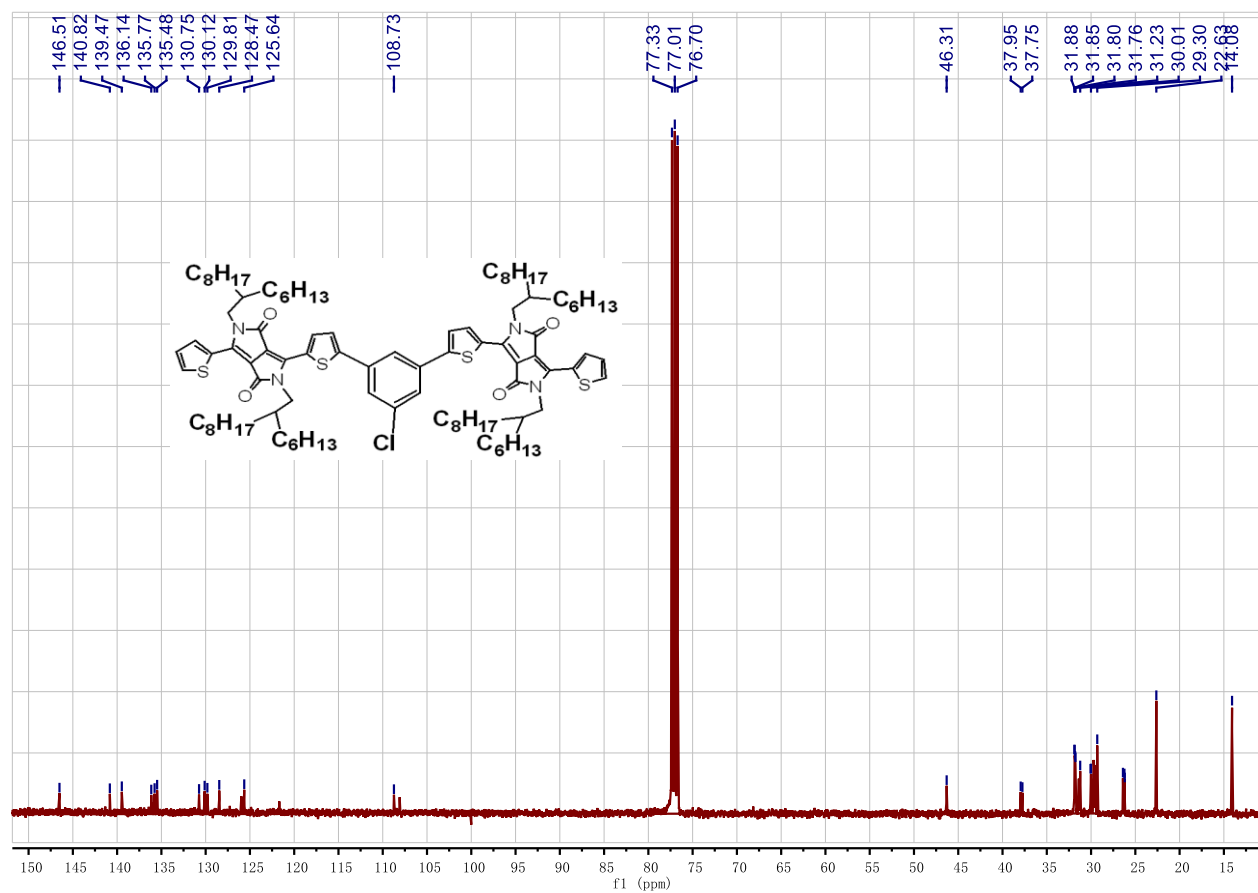**FigureS4** <sup>1</sup>H and <sup>13</sup>C NMR spectra of M3 in CDCl<sub>3</sub>.

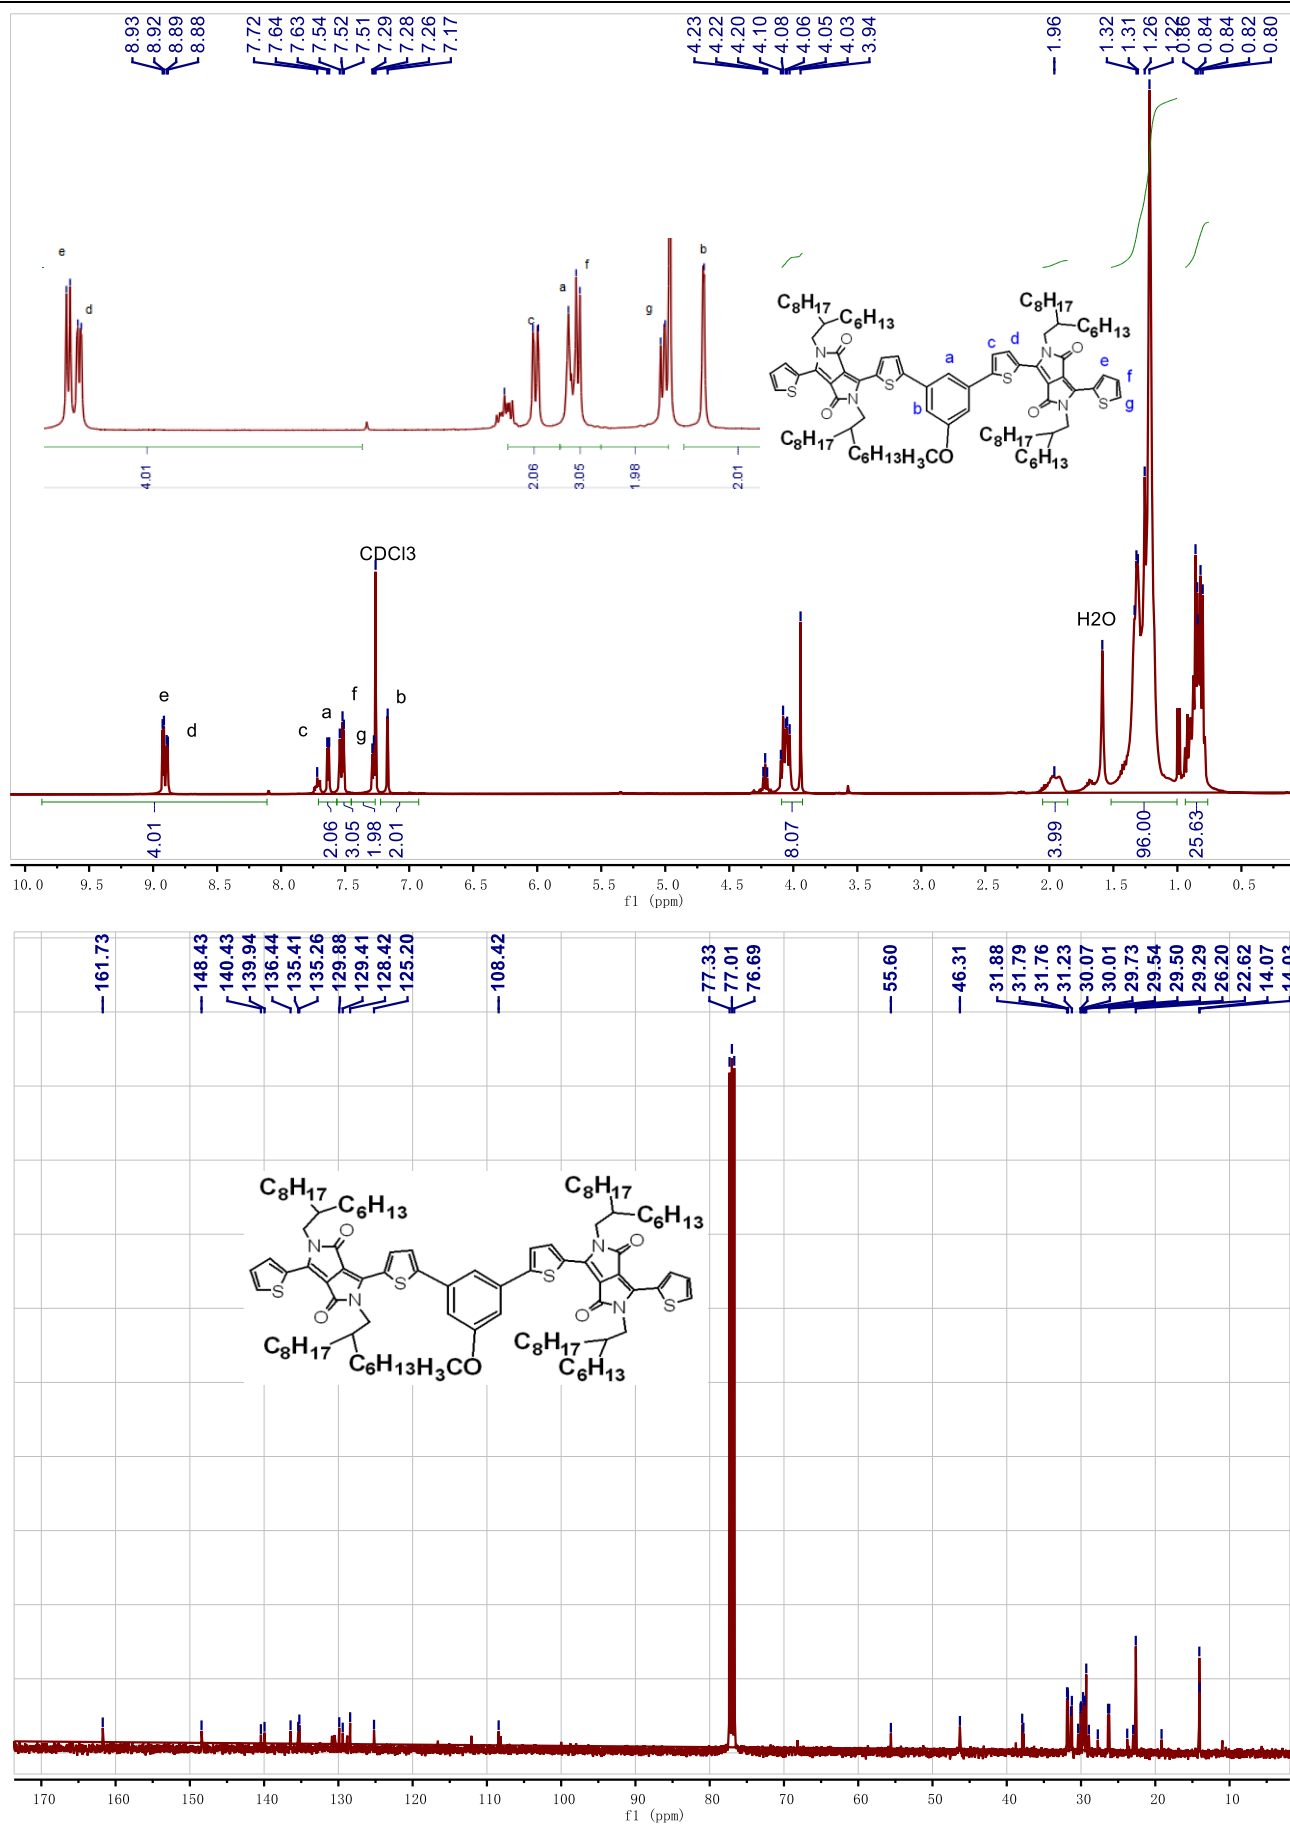

Figure S5  $^1\text{H}$  and  $^{13}\text{C}$  NMR spectra of **M4** in  $\text{CDCl}_3$ .

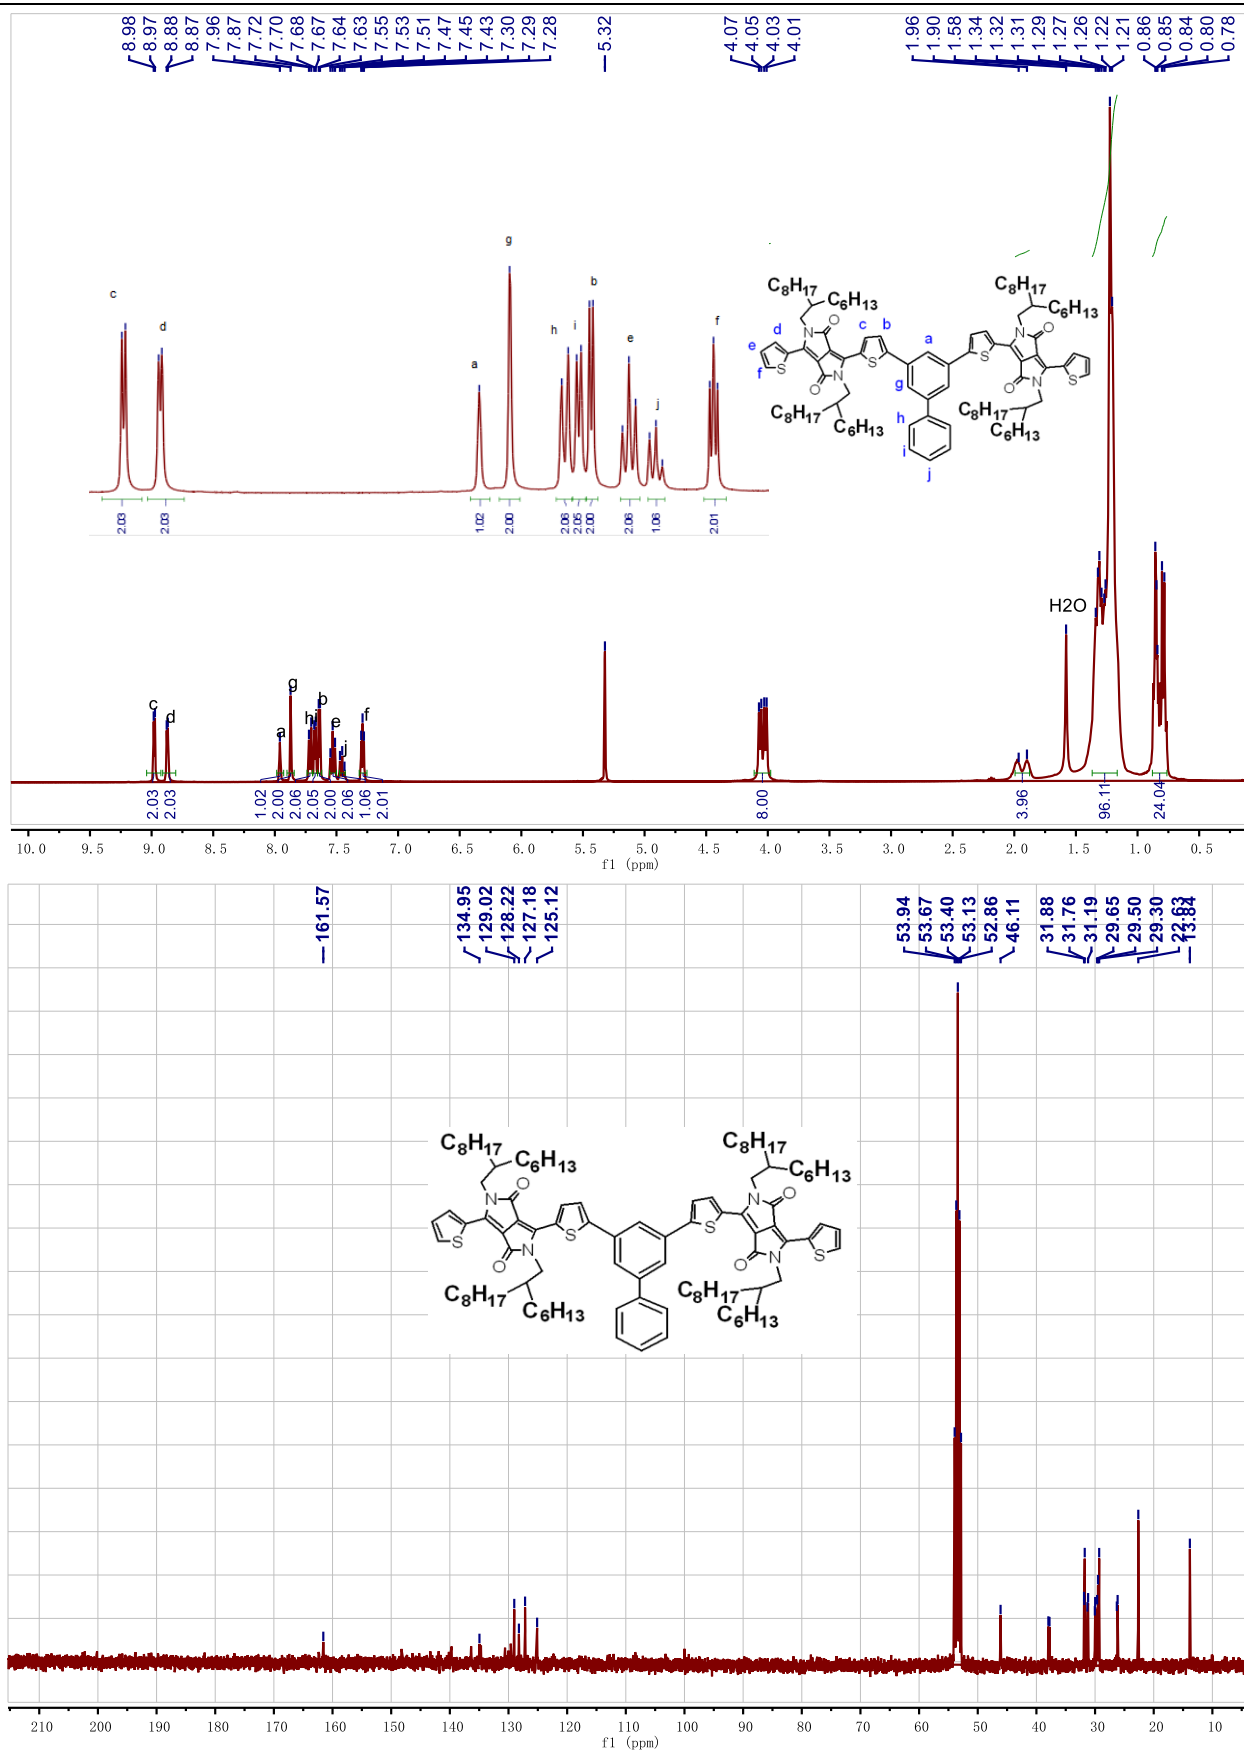**Figure S6**  $^1\text{H}$  and  $^{13}\text{C}$  NMR spectra of M5 in  $\text{CDCl}_3$ .

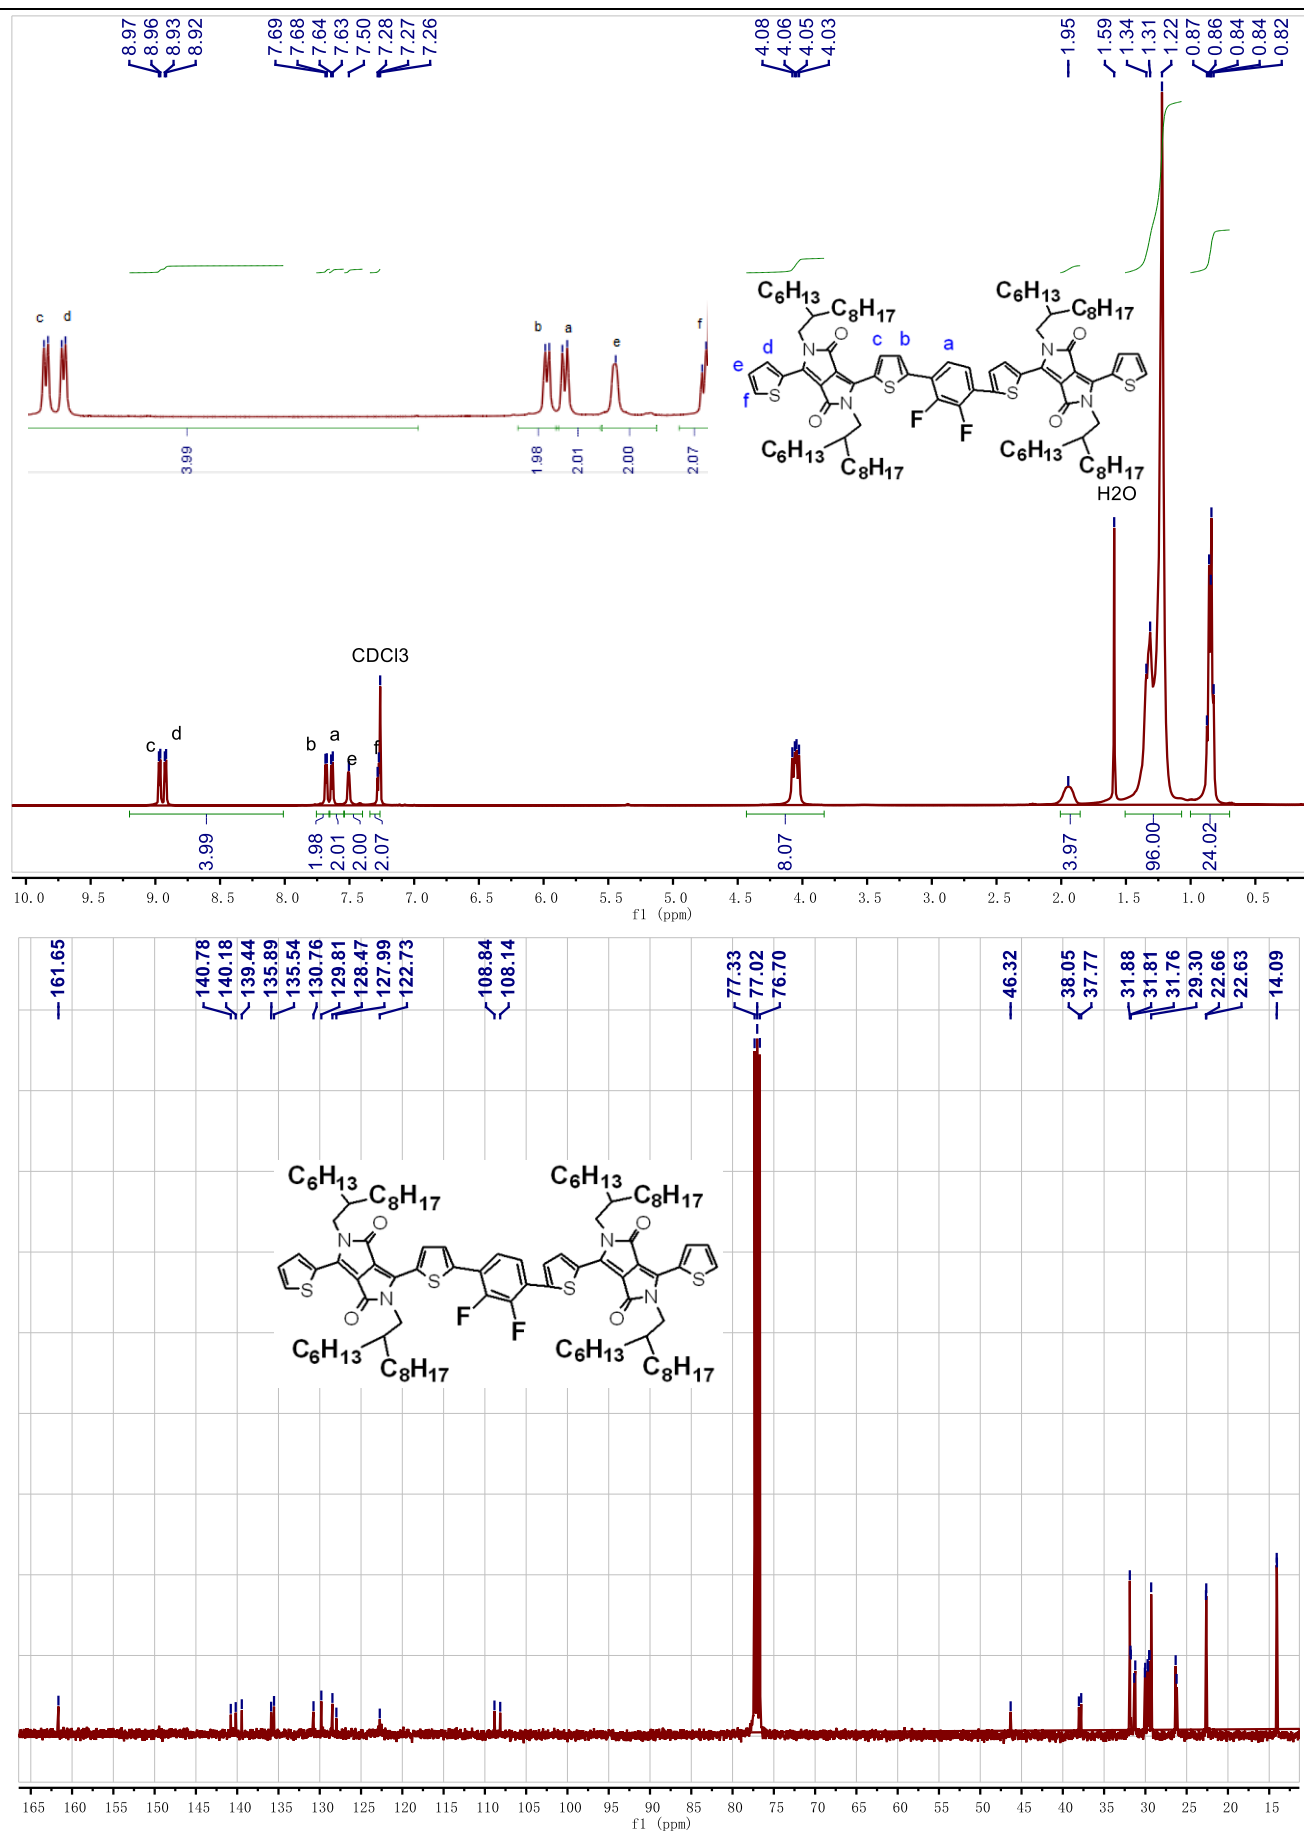**Figure S7**  $^1\text{H}$  and  $^{13}\text{C}$  NMR spectra of **M6** in  $\text{CDCl}_3$ .



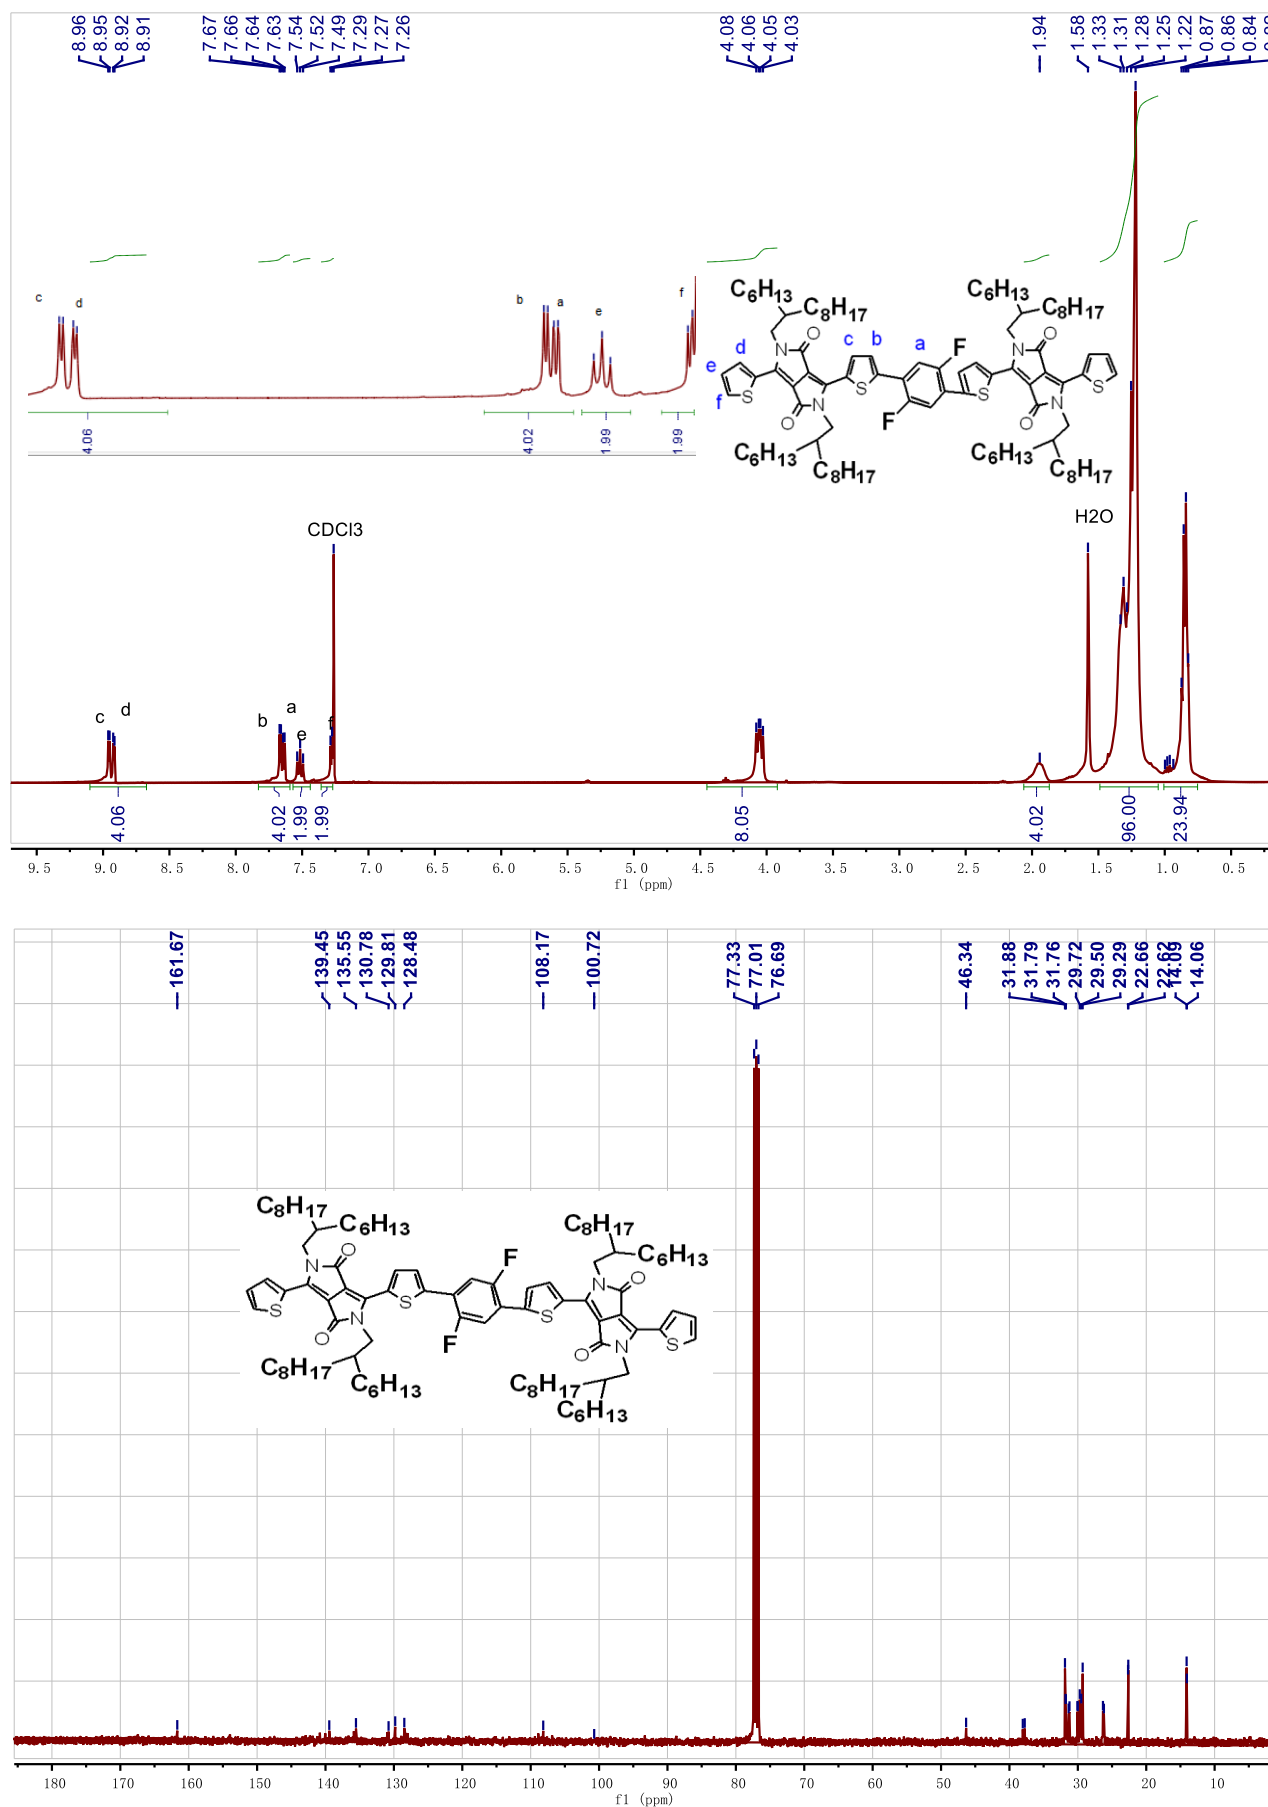**Figure S8**  $^1\text{H}$  and  $^{13}\text{C}$  NMR spectra of M7 in  $\text{CDCl}_3$ .

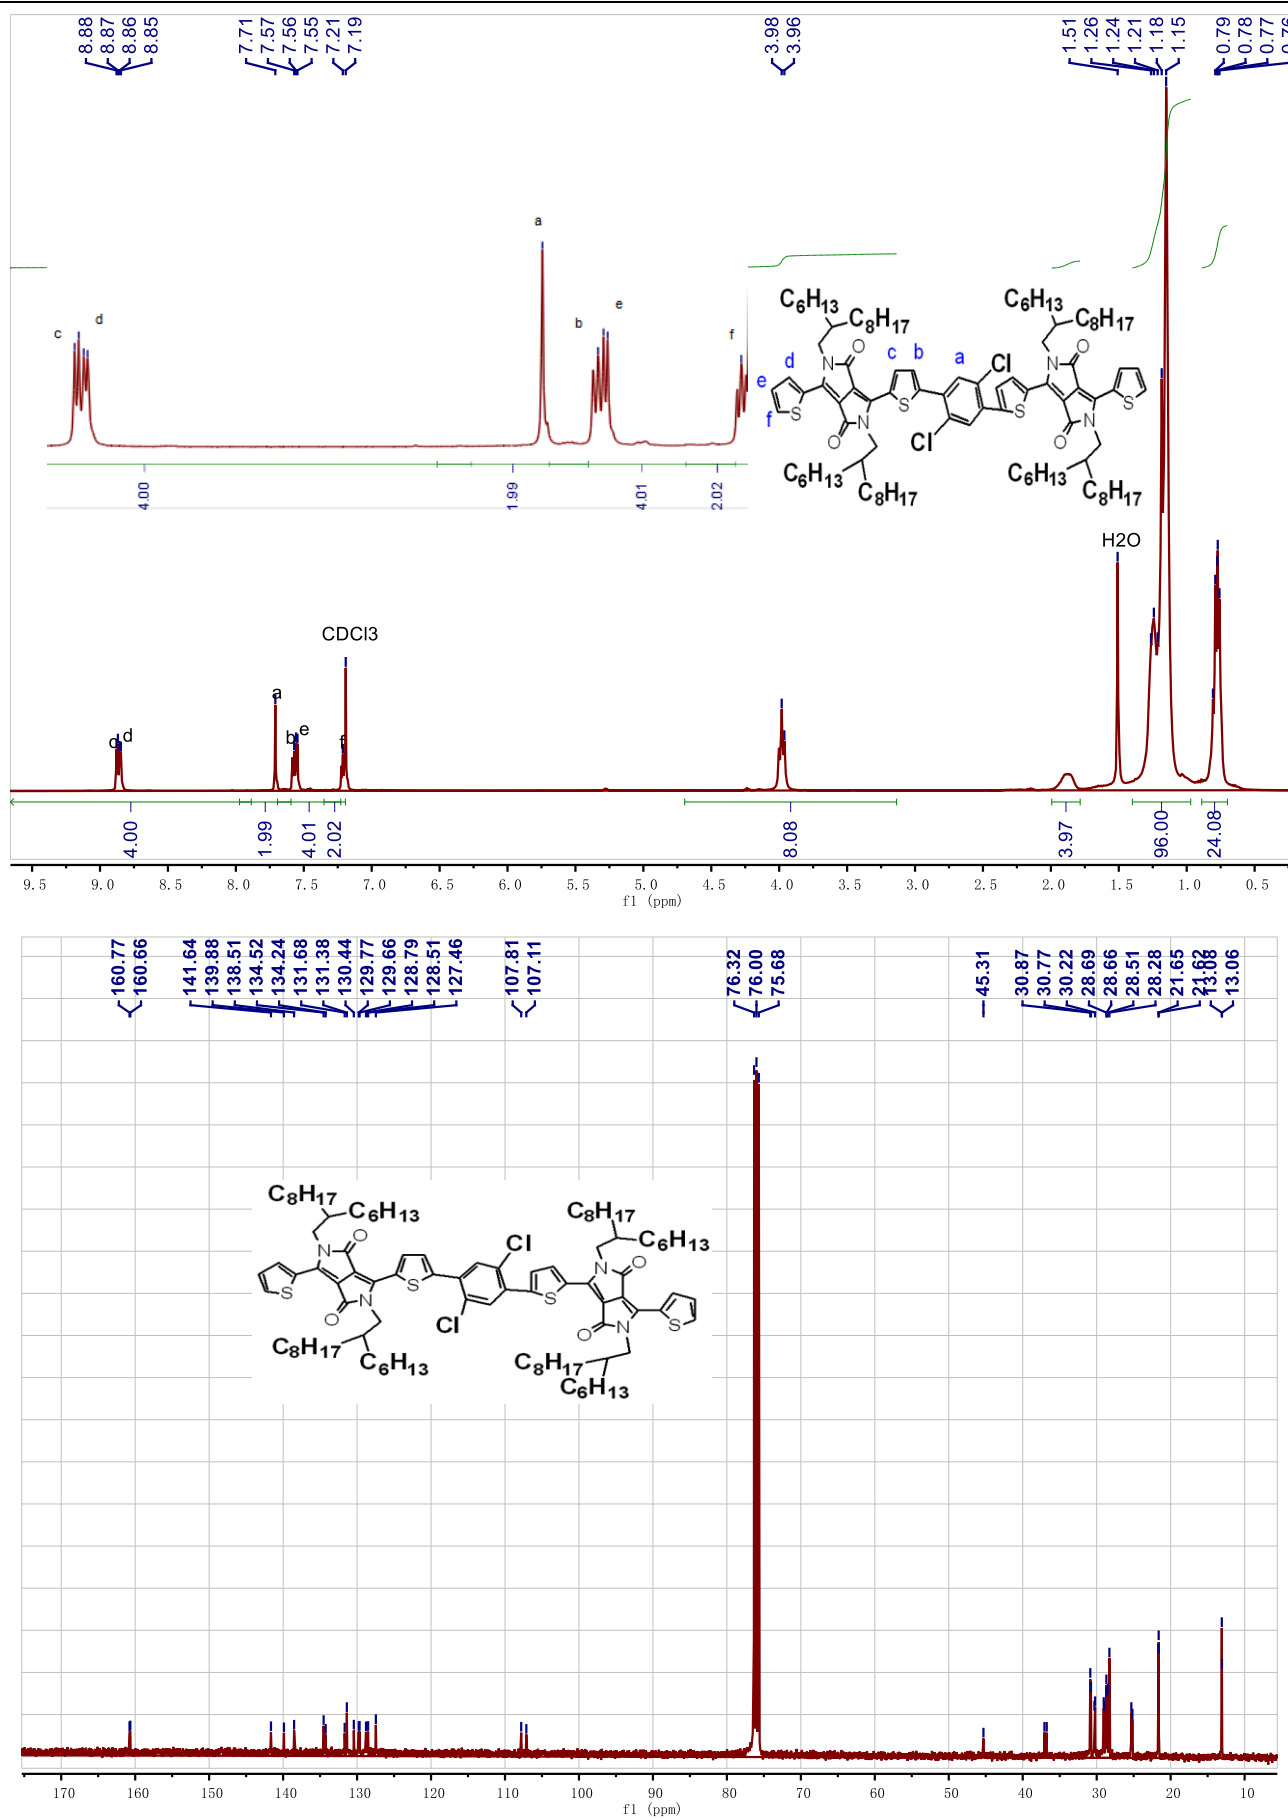

Figure S9  $^1\text{H}$  and  $^{13}\text{C}$  NMR spectra of **M8** in  $\text{CDCl}_3$ .

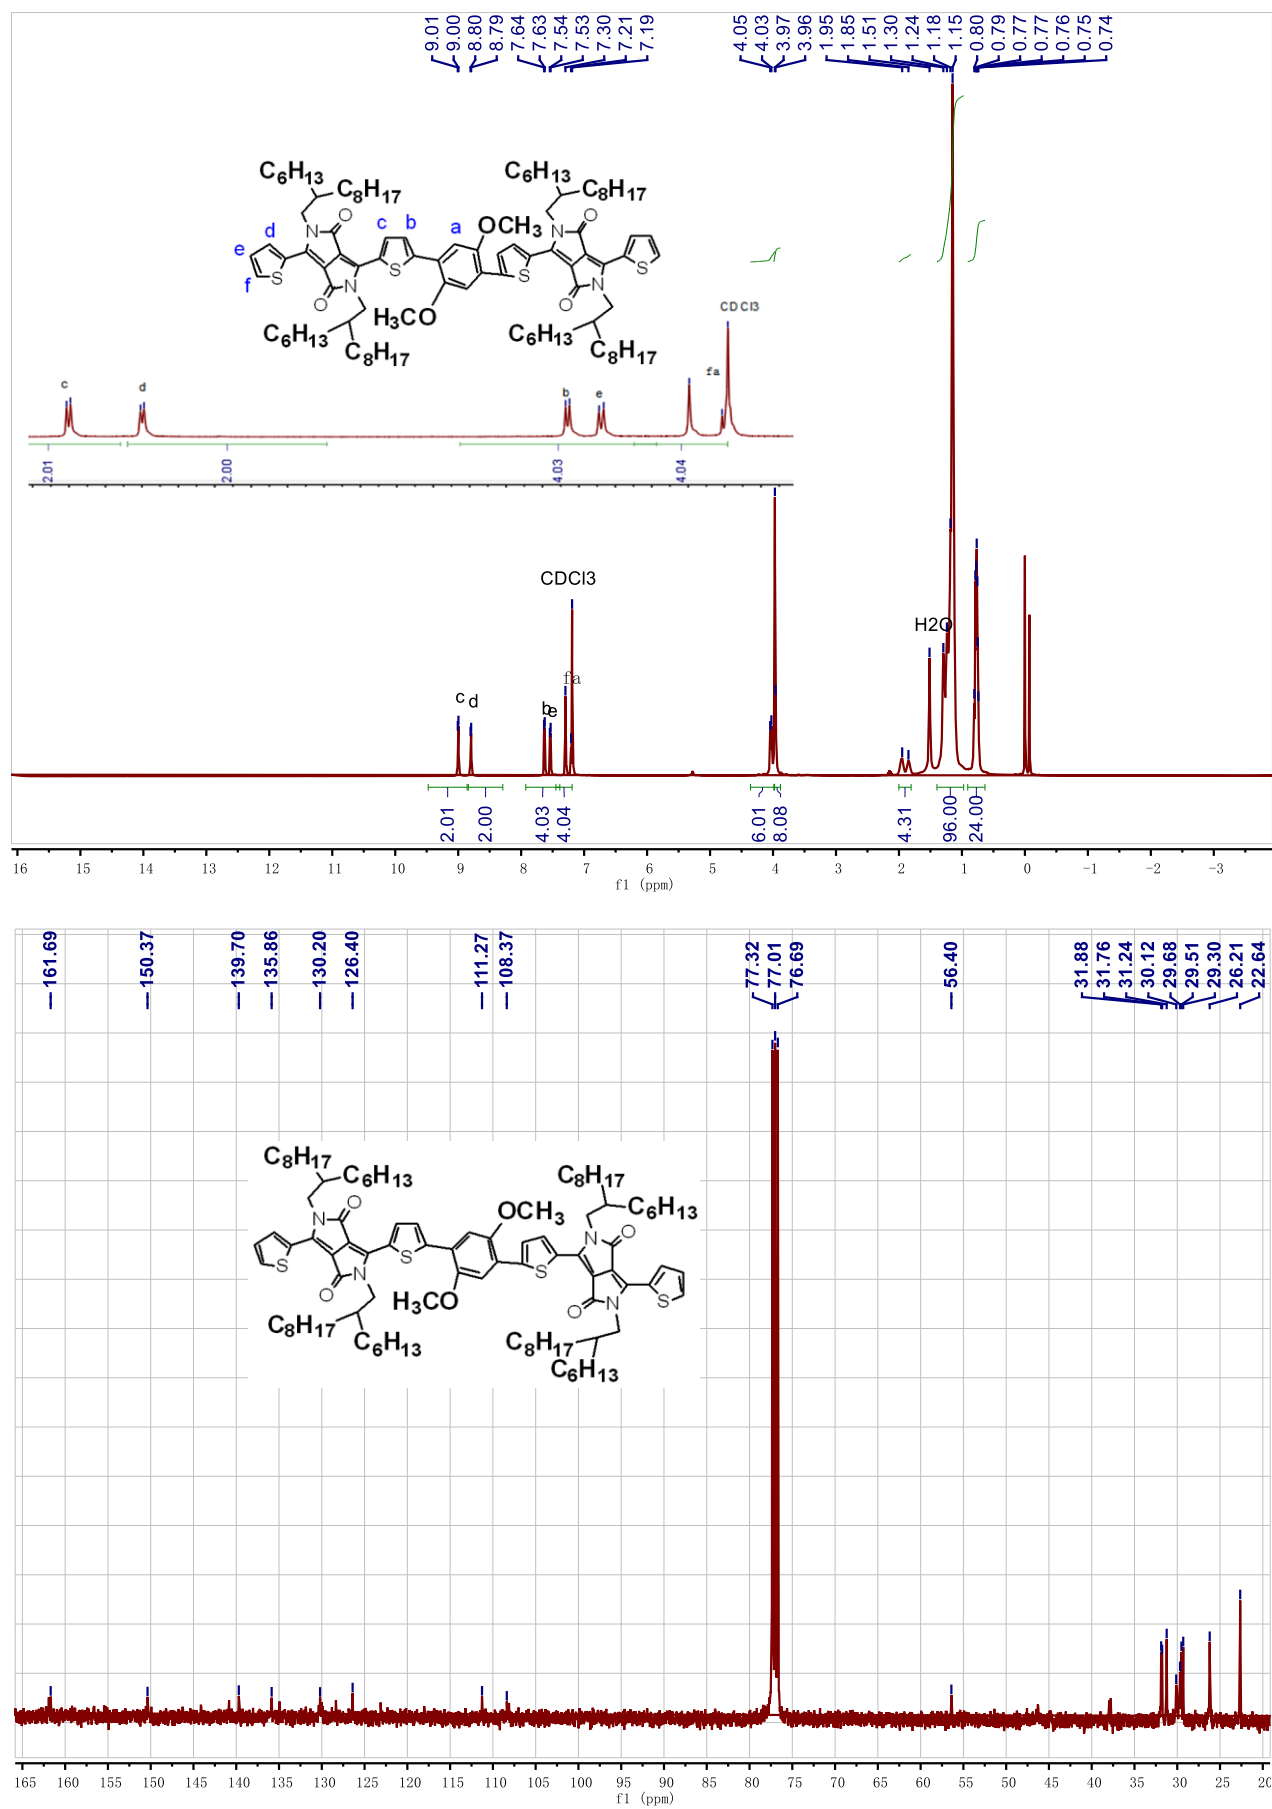

**Figure S10**  $^1\text{H}$  and  $^{13}\text{C}$  NMR spectra of **M9** in  $\text{CDCl}_3$ .

### 3. MALDI-TOF MS spectra

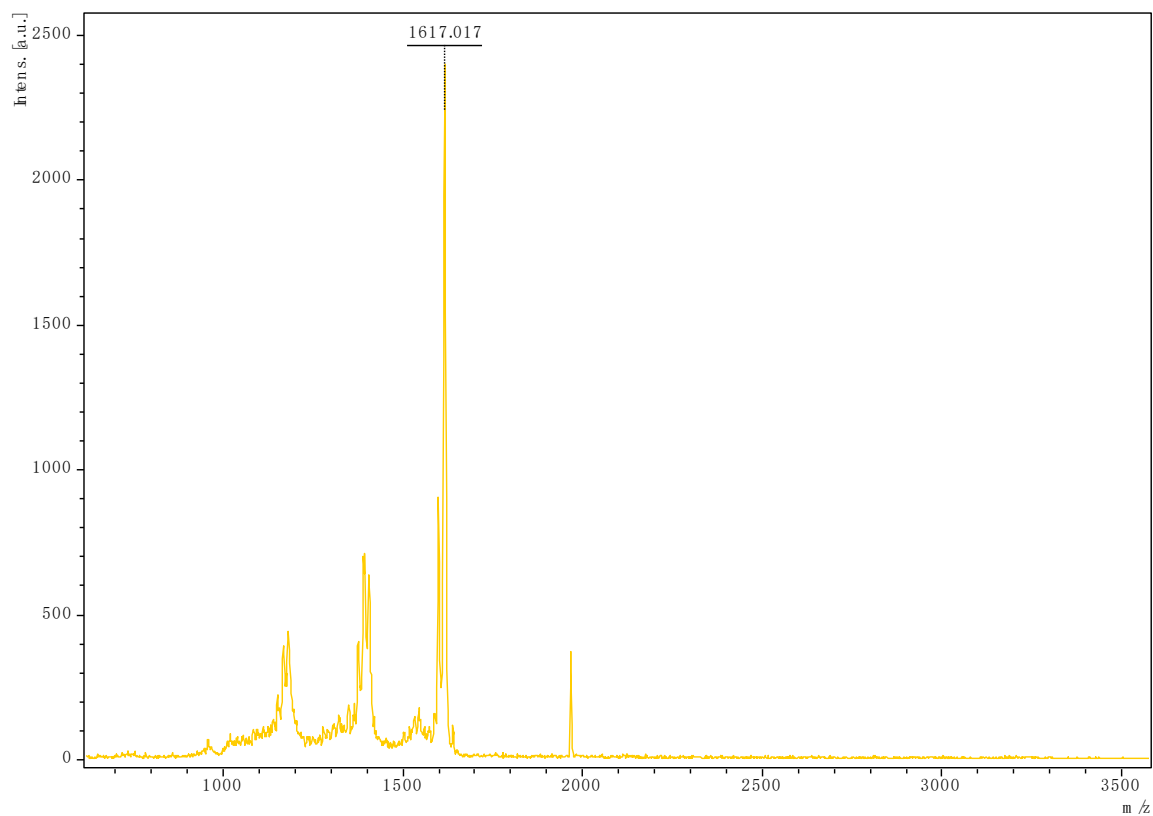

**FigureS11** MALDI-TOF MS spectrum of **M1**, calcd. 1617.5070, found 1617.0710 .

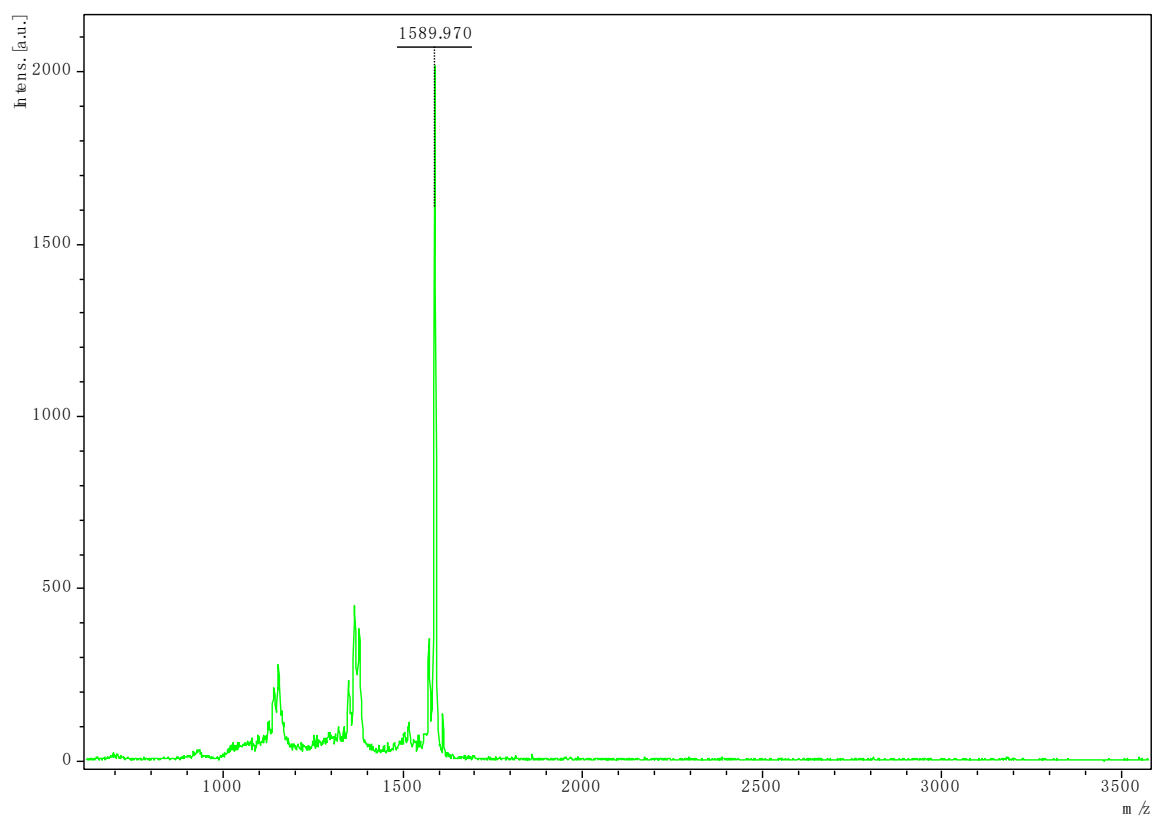

**FigureS12** MALDI-TOF MS spectrum of **M2**, calcd. 1590.5004, found 1589.9700.

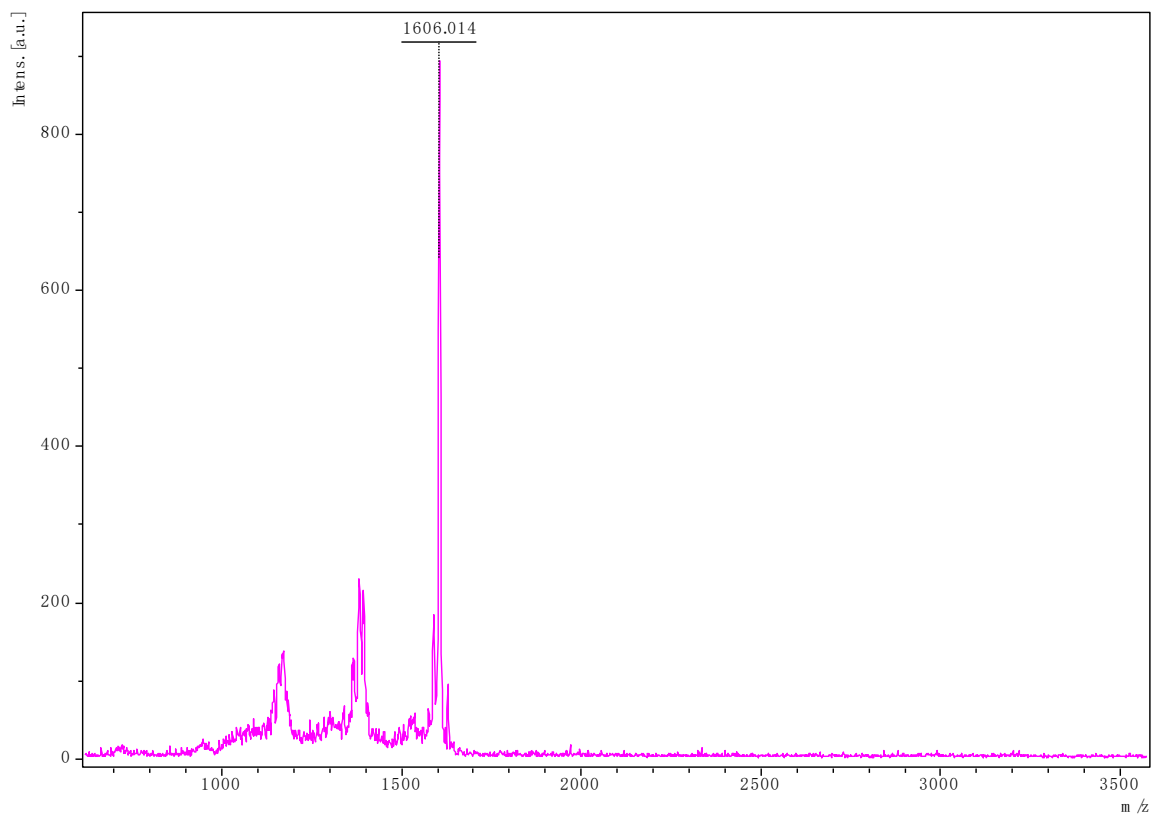

**FigureS13** MALDI-TOF MS spectrum of **M3**, calcd.1606.9520, found 1606.0140.

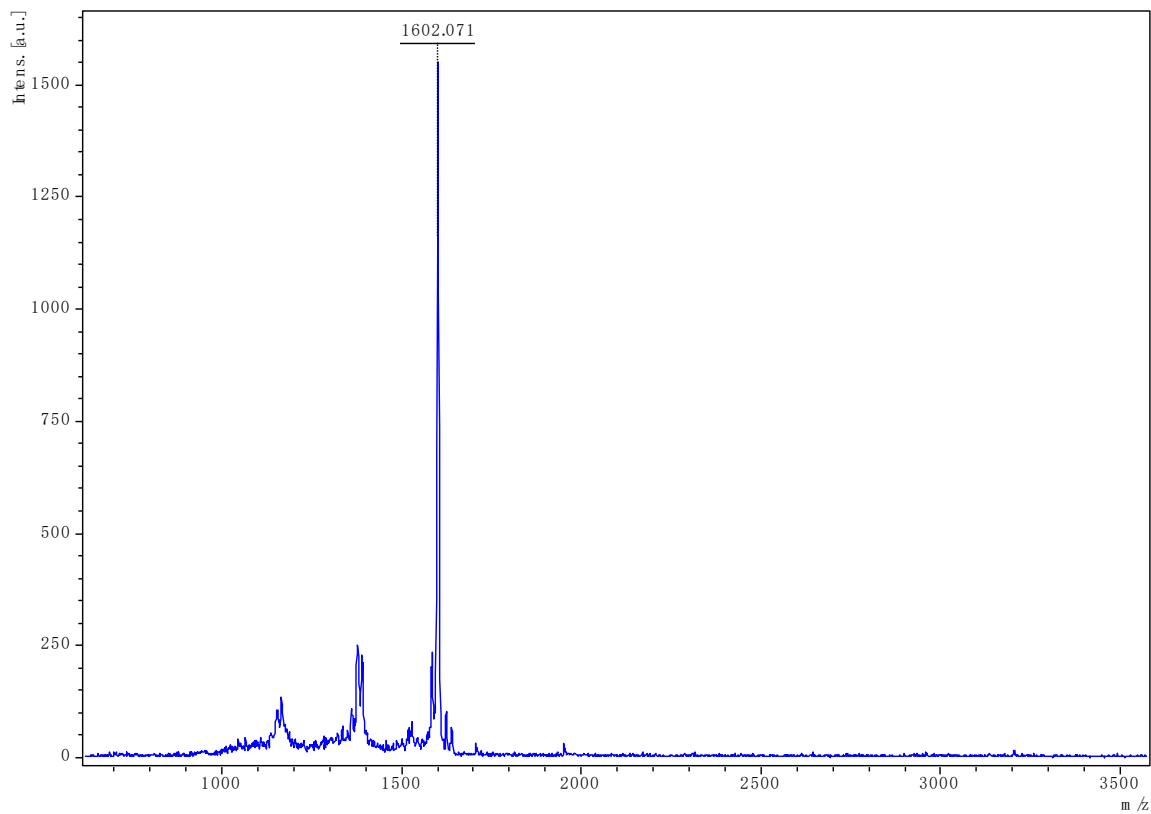

**FigureS14** MALDI-TOF MS spectrum of **M4**, calcd. 1602.5360, found 1602.0710.

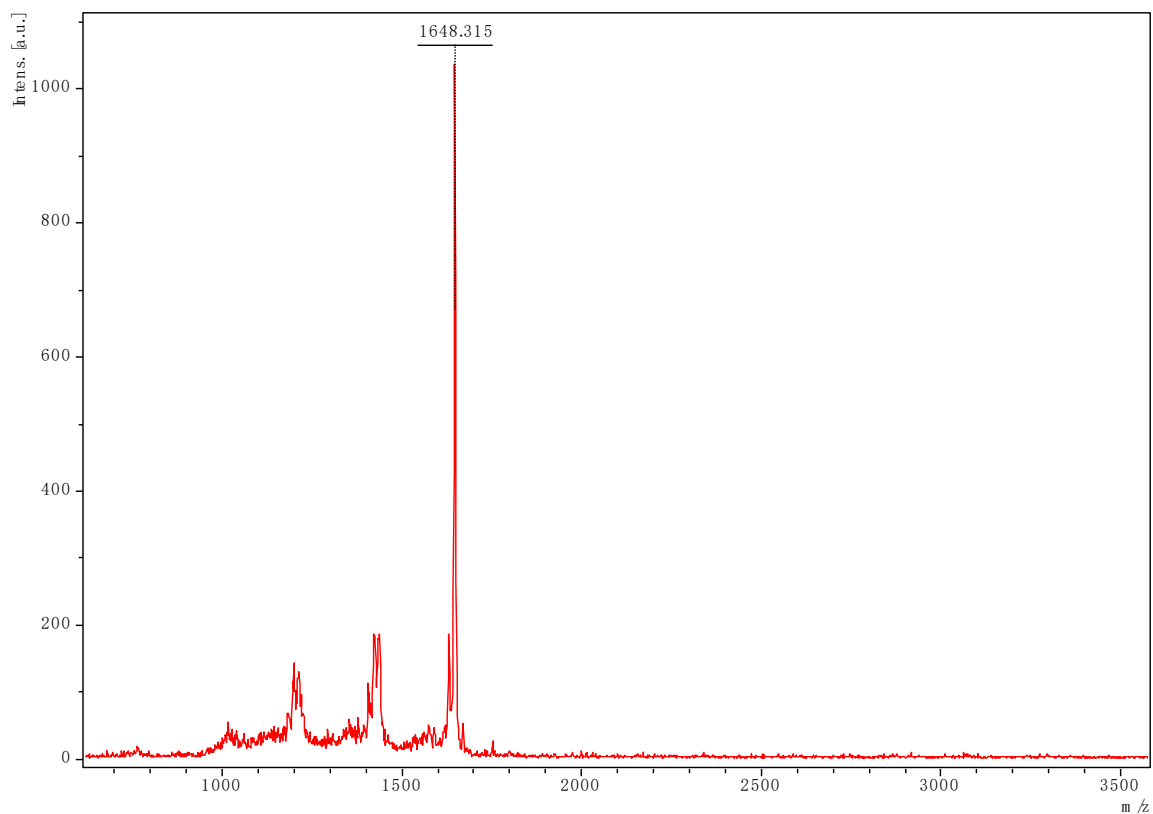

**FigureS15** MALDI-TOF MS spectrum of **M5**, calcd. 1648.6080, found 1648.3150.

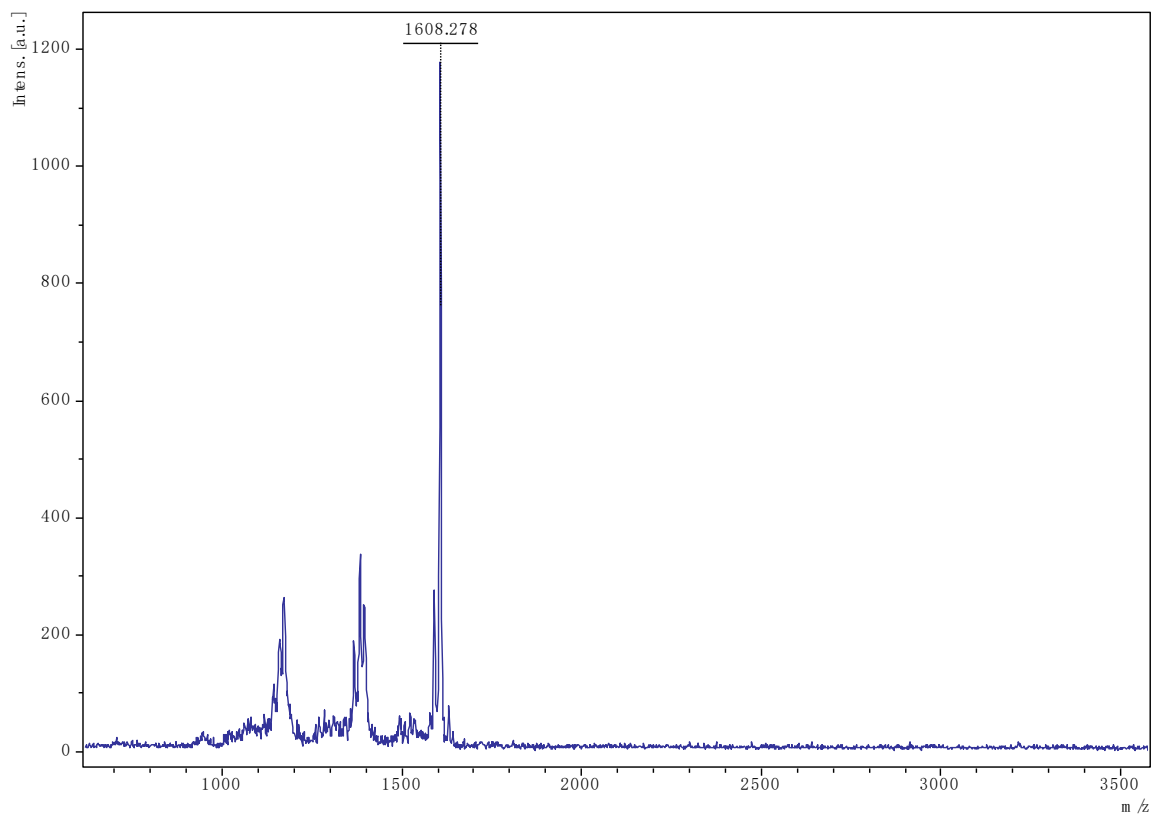

**FigureS16** MALDI-TOF MS spectrum of **M6**, calcd.1608.4900, found 1608.2780.

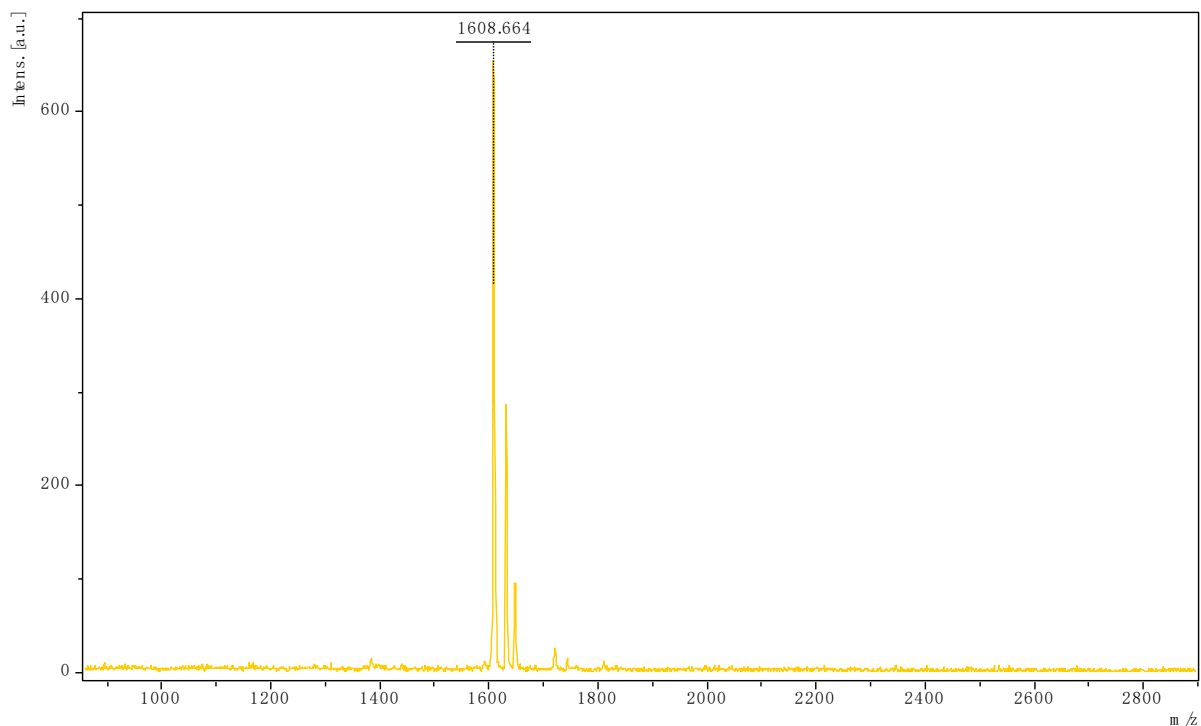

**FigureS17** MALDI-TOF MS spectrum of **M7**, calcd. 1608.4700, found 1608.6640.

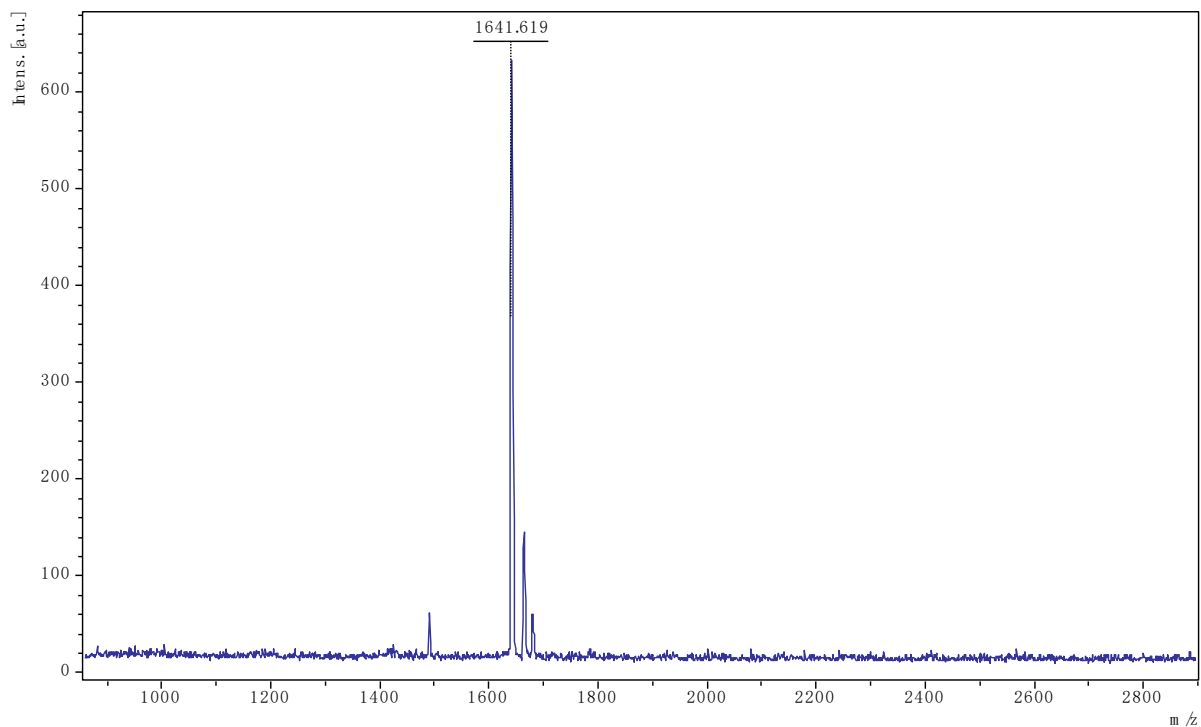

**FigureS18** MALDI-TOF MS spectrum of **M8**, calcd. 1641.3800, found 1641.6190.

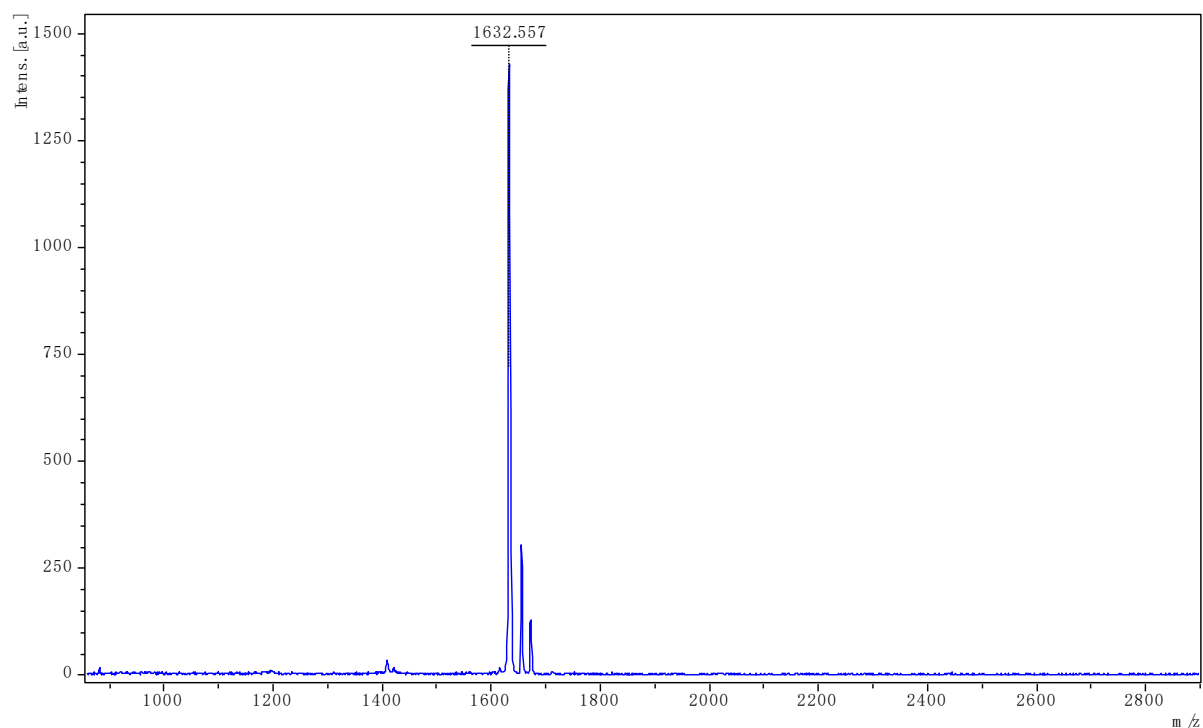

**FigureS19** MALDI-TOF MS spectrum of **M9**, calcd. 1632.5400, found 1632.5570.
